# Supplementary material
Source: PubMed Central journal article supplement (PMC7645868)
Supplement: am0c12020_si_001.pdf [file am0c12020_si_001.pdf]

Supporting information to

# Continuous-flow Production of Perfluorocarbon-loaded Polymeric Nanoparticles: from the Bench towards the Clinic

*Esmee Hoogendijk<sup>1</sup>, Edyta Swider<sup>1,3</sup>, Alexander H. J. Staal<sup>1,3</sup>, Paul B. White<sup>2</sup>, N. Koen van Riessen<sup>1</sup>, Gunnar Glaßer<sup>3</sup>, Ingo Lieberwirth<sup>3</sup>, Anna Musyanovych,<sup>4</sup> Christophe A. Serra<sup>5</sup>, Mangala Srinivas<sup>1,3,\*</sup>, Olga Koshkina<sup>1,3,\*\*</sup>*

<sup>1</sup>Department of Tumor Immunology, Radboud Institute for Molecular Life Sciences, Radboud University Medical Center, Geert Grooteplein 26/28, 6525GA, Nijmegen, The Netherlands

<sup>2</sup>Institute for Molecules and Materials, Radboud University, Nijmegen, The Netherlands

<sup>3</sup>Max Planck Institute for Polymer Research, Ackermannweg 10, 55128 Mainz, Germany

<sup>4</sup>Fraunhofer IMM, Carl-Zeiss Str. 18-20, 55129 Mainz, Germany

<sup>5</sup>Université de Strasbourg, CNRS, Institut Charles Sadron, 23 rue du Loess, F- 67083 Strasbourg, France

## **Corresponding Author**

\*koshkina@mpip-mainz.mpg.de

\*mangala.srinivas@radboudumc.nl

## Content

|      |                                                                                  |    |
|------|----------------------------------------------------------------------------------|----|
| 1.   | Effect of different parameters of synthesis on nanoparticle characteristics..... | 3  |
| 1.1. | Impact of ratio PFCE / organic phase .....                                       | 3  |
| 1.2. | Impact of ratio mixture 1 / aqueous phase.....                                   | 3  |
| 1.3. | Impact of total flowrate .....                                                   | 4  |
| 1.4. | Impact of type of perfluorocarbon on PFC-PLGA nanoparticles .....                | 5  |
| 1.5. | Impact of type of solvent.....                                                   | 6  |
| 1.6. | Continuous large-scale production of nanoparticles .....                         | 7  |
| 2.   | Additional cell and imaging data .....                                           | 9  |
| 2.1. | Characteristics of nanoparticles used for MTT assay .....                        | 9  |
| 2.2. | Characterization of nanoparticles loaded with Atto-647 for confocal imaging..... | 9  |
| 2.3. | Confocal microscopy of cells after nanoparticle uptake .....                     | 10 |
| 2.4. | <sup>19</sup> F MRI and Ultrasound in vitro .....                                | 12 |
| 2.5. | <sup>19</sup> F MRI <i>in vivo</i> at different timepoints .....                 | 14 |

## 1. Effect of different parameters of synthesis on nanoparticle characteristics

### 1.1. Impact of ratio PFCE / organic phase

**Table S1. Flow rates and characterization of PFCE-PLGA nanoparticles (DCM as a solvent) with NMR and DLS ( $Q_{\text{tot}} = 25 \text{ ml min}^{-1}$ ).**

| Sample | $Q_{\text{PFCE}}$<br>(mL/min) | $Q_{\text{PLGA}}$<br>(mL/min) | $Q_{\text{PVA}}$<br>(mL/min) | $Q_{\text{PFCE}} / Q_{\text{O}}$ | $R_h$ (nm) | PDI  | PFCE content<br>(wt.-%) |
|--------|-------------------------------|-------------------------------|------------------------------|----------------------------------|------------|------|-------------------------|
| PFCE6  | 0.83                          | 4.17                          | 20                           | 0.2                              | 174        | 0.16 | 22                      |
| PFCE3  | 1.15                          | 3.85                          | 20                           | 0.3                              | 180        | 0.17 | 28                      |
| PFCE7  | 1.43                          | 3.57                          | 20                           | 0.4                              | 166        | 0.24 | 23                      |
| PFCE8  | 1.87                          | 3.13                          | 20                           | 0.6                              | 179        | 0.21 | 22                      |
| PFCE9  | 2.5                           | 2.5                           | 20                           | 1                                | 171        | 0.23 | 26                      |

### 1.2. Impact of ratio mixture 1 / aqueous phase

**Table S2. Flow rates and characterization of PFCE-PLGA nanoparticles (DCM as a solvent) with NMR and DLS ( $Q_{\text{tot}} = 25 \text{ mL min}^{-1}$ ,  $Q_{\text{PFCE}}/Q_{\text{PLGA}} = 0.3$ ).**

| Sample | $Q_{\text{PFCE}}$<br>(mL/min) | $Q_{\text{PLGA}}$<br>(mL/min) | $Q_{\text{PVA}}$<br>(mL/min) | $Q_{\text{M}}/Q_{\text{PVA}}$ | $R_h$ (nm) | PDI  | PFCE content<br>(wt.-%) |
|--------|-------------------------------|-------------------------------|------------------------------|-------------------------------|------------|------|-------------------------|
| PFCE1  | 0.64                          | 2.14                          | 22.22                        | 0.125                         | 181        | 0.19 | 26                      |
| PFCE2  | 0.82                          | 2.75                          | 21.43                        | 0.167                         | 188        | 0.19 | 28                      |
| PFCE3  | 1.15                          | 3.85                          | 20                           | 0.25                          | 180        | 0.17 | 28                      |
| PFCE4  | 1.44                          | 4.81                          | 18.75                        | 0.33                          | 167        | 0.21 | 21                      |
| PFCE5  | 1.92                          | 6.42                          | 16.66                        | 0.50                          | 168        | 0.19 | 19                      |

### 1.3. Impact of total flowrate

**Table S3. Flow rates and characterization of PFCE-PLGA nanoparticles made with DCM as solvent (Figure 1b;  $Q_{\text{PFCE}}/Q_{\text{PLGA}} = 0.3$ ,  $Q_{\text{MI}}/Q_{\text{PVA}} = 0.25$  ).**

| <b>Sample</b> | <b><math>Q_{\text{PFCE}}</math><br/>(mL/min)</b> | <b><math>Q_{\text{PLGA}}</math><br/>(mL/min)</b> | <b><math>Q_{\text{PVA}}</math><br/>(mL/min)</b> | <b><math>R_h</math> (nm)</b> | <b>PDI</b> | <b>PFCE content<br/>(wt.-%)</b> |
|---------------|--------------------------------------------------|--------------------------------------------------|-------------------------------------------------|------------------------------|------------|---------------------------------|
| <b>PFCE10</b> | 0.29                                             | 0.97                                             | 5                                               | 171                          | 0.17       | 16                              |
| <b>PFCE11</b> | 0.29                                             | 0.97                                             | 5                                               | 164                          | 0.2        | 20                              |
| <b>PFCE12</b> | 0.58                                             | 1.93                                             | 10                                              | 190                          | 0.12       | 23                              |
| <b>PFCE13</b> | 0.58                                             | 1.93                                             | 10                                              | 167                          | 0.23       | 29                              |
| <b>PFCE14</b> | 0.87                                             | 2.9                                              | 15                                              | 191                          | 0.16       | 35                              |
| <b>PFCE15</b> | 0.87                                             | 2.9                                              | 15                                              | 194                          | 0.18       | 31                              |
| <b>PFCE16</b> | 1.15                                             | 3.85                                             | 20                                              | 193                          | 0.13       | 30                              |
| <b>PFCE3</b>  | 1.15                                             | 3.85                                             | 20                                              | 180                          | 0.17       | 28                              |
| <b>PFCE17</b> | 1.44                                             | 4.81                                             | 25                                              | 172                          | 0.2        | 30                              |
| <b>PFCE18</b> | 1.44                                             | 4.81                                             | 25                                              | 169                          | 0.2        | 25                              |
| <b>PFCE19</b> | 1.73                                             | 5.78                                             | 30                                              | 152                          | 0.17       | 27                              |
| <b>PFCE20</b> | 1.73                                             | 5.78                                             | 30                                              | 141                          | 0.18       | 28                              |

#### 1.4. Impact of type of perfluorocarbon on PFC-PLGA nanoparticles

**Table S4. Flow rates and characterization of PFOB-PLGA nanoparticles made with DCM as solvent (in Figure 1c and Figure 5).**

| Sample        | $Q_{PFC}$<br>(mL/min) | $Q_{PLGA}$<br>(mL/min) | $Q_{PVA}$<br>(mL/min) | $R_h$ (nm) | PDI  | PFOB content<br>(wt.-%) |
|---------------|-----------------------|------------------------|-----------------------|------------|------|-------------------------|
| <b>PFOB1</b>  | 0.58                  | 1.93                   | 10                    | 194        | 0.31 | 42                      |
| <b>PFOB2</b>  | 0.58                  | 1.93                   | 10                    | 199        | 0.36 | 38                      |
| <b>PFOB3</b>  | 0.87                  | 2.9                    | 15                    | 183        | 0.31 | 54                      |
| <b>PFOB4</b>  | 0.87                  | 2.9                    | 15                    | 189        | 0.31 | 44                      |
| <b>PFOB5</b>  | 1.15                  | 3.85                   | 20                    | 191        | 0.27 | 52                      |
| <b>PFOB6</b>  | 1.15                  | 3.85                   | 20                    | 166        | 0.25 | 49                      |
| <b>PFOB7</b>  | 1.44                  | 4.81                   | 25                    | 163        | 0.21 | 61                      |
| <b>PFOB8</b>  | 1.44                  | 4.81                   | 25                    | 157        | 0.27 | 55                      |
| <b>PFOB9</b>  | 1.73                  | 5.78                   | 30                    | 130        | 0.2  | 52                      |
| <b>PFOB10</b> | 1.73                  | 5.78                   | 30                    | 143        | 0.2  | 52                      |

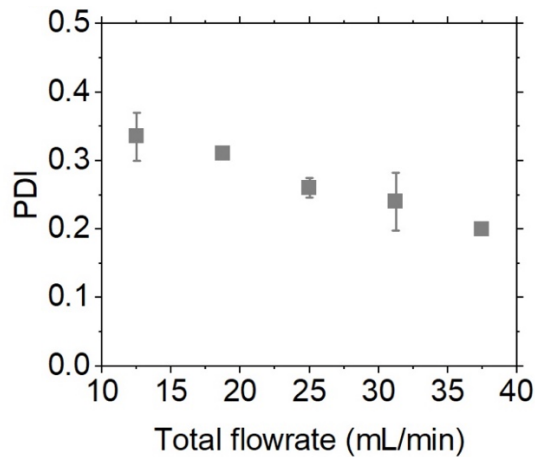

**Figure S1. PDI of PFOB-PLGA nanoparticles. An increase of flow rates results in a smaller PDI. All batches are repeated once**

## 1.5. Impact of type of solvent

**Table S5. Flow rates and characterization of PFCE-PLGA nanoparticles from Figure 2.**

| Sample        | Organic solvent | $Q_{\text{PFCE}}$<br>(mL/min) | $Q_{\text{PLGA}}$<br>(mL/min) | $Q_{\text{PVA}}$<br>(mL/min) | $R_n$ (nm) | PDI  | PFCE content<br>(wt.-%) |
|---------------|-----------------|-------------------------------|-------------------------------|------------------------------|------------|------|-------------------------|
| <b>PFCE13</b> | DCM             | 0.58                          | 1.93                          | 10                           | 167        | 0.23 | 29                      |
| <b>PFCE3</b>  | DCM             | 1.15                          | 3.85                          | 20                           | 180        | 0.17 | 28                      |
| <b>PFCE20</b> | DCM             | 1.73                          | 5.78                          | 30                           | 141        | 0.18 | 28                      |
| <b>PFCE21</b> | Chloroform      | 0.58                          | 1.93                          | 10                           | 168        | 0.25 | 35                      |
| <b>PFCE22</b> | Chloroform      | 1.15                          | 3.85                          | 20                           | 162        | 0.2  | 42                      |
| <b>PFCE23</b> | Chloroform      | 1.73                          | 5.78                          | 30                           | 136        | 0.12 | 36                      |
| <b>PFCE24</b> | DCM/MeCN        | 0.58                          | 1.93                          | 10                           | 139        | 0.18 | 9                       |
| <b>PFCE25</b> | DCM/MeCN        | 1.15                          | 3.85                          | 20                           | 126        | 0.14 | 10                      |
| <b>PFCE26</b> | DCM/MeCN        | 1.73                          | 5.78                          | 30                           | 112        | 0.11 | 9                       |
| <b>PFCE27</b> | AcOEt           | 0.58                          | 1.93                          | 10                           | 114        | 0.23 | 9                       |
| <b>PFCE28</b> | AcOEt           | 1.15                          | 3.85                          | 20                           | 96         | 0.08 | 3                       |
| <b>PFCE29</b> | AcOEt           | 1.73                          | 5.78                          | 30                           | 87         | 0.11 | 2                       |

## 1.6. Continuous large-scale production of nanoparticles

**Table S6. Flow rates and characterization of PFCE-PLGA nanoparticles (DCM as solvent) produced during longer run.**

| <b>Fraction</b>                   | <b>Q<sub>PFCE</sub><br/>(mL/min)</b> | <b>Q<sub>PLGA</sub><br/>(mL/min)</b> | <b>Q<sub>PVA</sub><br/>(mL/min)</b> | <b>R<sub>n</sub> (nm)</b> | <b>PDI</b> | <b>PFCE<br/>content<br/>(wt.-%)</b> |
|-----------------------------------|--------------------------------------|--------------------------------------|-------------------------------------|---------------------------|------------|-------------------------------------|
| <b>PFCE30A</b>                    | 1.15                                 | 3.85                                 | 20                                  | 172                       | 0.21       | 33                                  |
| <b>PFCE30B</b>                    | 1.15                                 | 3.85                                 | 20                                  | 176                       | 0.20       | 30                                  |
| <b>PFCE30C</b>                    | 1.15                                 | 3.85                                 | 20                                  | 169                       | 0.18       | 31                                  |
| <b>PFCE30D</b>                    | 1.15                                 | 3.85                                 | 20                                  | 174                       | 0.17       | 31                                  |
| <b>PFCE30E</b>                    | 1.15                                 | 3.85                                 | 20                                  | 172                       | 0.21       | 30                                  |
| <b>Average</b>                    |                                      |                                      |                                     | 173                       | 0.19       | 31                                  |
| <b>Std.<br/>deviation<br/>(%)</b> |                                      |                                      |                                     | 1.3                       | 8.5        | 3.6                                 |

**Table S7. Flow rates and characterization of different fractions of PFCE-PLGA nanoparticles (chloroform as a solvent) from longer run.**

| <b>Fraction</b>                   | <b>Q<sub>PFCE</sub><br/>(mL/min)</b> | <b>Q<sub>PLGA</sub><br/>(mL/min)</b> | <b>Q<sub>PVA</sub><br/>(mL/min)</b> | <b>R<sub>n</sub> (nm)</b> | <b>PDI</b> | <b>PFCE<br/>content<br/>(wt.-%)</b> |
|-----------------------------------|--------------------------------------|--------------------------------------|-------------------------------------|---------------------------|------------|-------------------------------------|
| <b>PFCE31A</b>                    | 1.44                                 | 4.81                                 | 25                                  | 187                       | 0.30       | 45                                  |
| <b>PFCE31B</b>                    | 1.44                                 | 4.81                                 | 25                                  | 188                       | 0.33       | 44                                  |
| <b>PFCE31C</b>                    | 1.44                                 | 4.81                                 | 25                                  | 179                       | 0.28       | 45                                  |
| <b>Average</b>                    |                                      |                                      |                                     | 185                       | 0.30       | 45                                  |
| <b>Std.<br/>deviation<br/>(%)</b> |                                      |                                      |                                     | 2.2                       | 6.8        | 1.1                                 |

## Operation stability over longer period of time

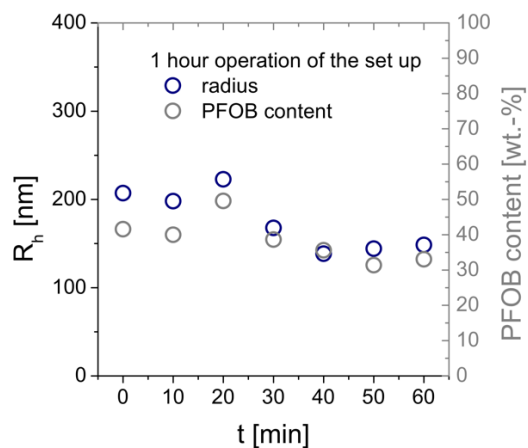

**Figure S2. Operation of the set-up for one hour tested with PFOB as cargo at flowrates  $Q_{PVA} = 20\text{ mL min}^{-1}$ ,  $Q_{PLGA} = 3.85\text{ mL min}^{-1}$ ,  $Q_{PFOB} = 1.15\text{ mL min}^{-1}$ . The PDI values were between 0.2 and 0.3 similar, as in a shorter run. Nanoparticles were isolated by centrifugation and freeze-dried prior analysis.**

We accessed the performance of the set up over a longer period of time for the production of PFOB-PLGA nanoparticles. The set up was operated for one hour, and the fractions were collected for purification and analysis every 10 minutes. The standard deviation of radius was 18% and the standard deviation of PFOB content was 15%. This deviation is comparable to the batch production. It shows that the implementation of quality control mechanisms is necessary prior the use of the set up for the production of larger amounts of nanoparticles. Ideally, the set up should be extended with online detection and online purification methods for the large-scale process. All fractions had PFOB content above 30 wt.-% showing that they are suitable for  $^{19}\text{F}$  MRI applications. Thus, even with the given variation between the fractions the continuous method is less work intensive than the batch method and allows to obtain higher yields in a shorter time.



## 2. Additional cell and imaging data

### 2.1.Characteristics of nanoparticles used for MTT assay

**Table S8. Flow rates and characterization of PFCE-PLGA nanoparticles in Figure 4a and S2**

| ID in Figure 4a or S2 | Sample | Organic solvent | $Q_{PFCE}$ (mL/min) | $Q_{PLGA}$ (mL/min) | $Q_{PVA}$ (mL/min) | $R_h$ (nm) | PDI  | PFCE content (wt.-%) |
|-----------------------|--------|-----------------|---------------------|---------------------|--------------------|------------|------|----------------------|
| DCM 1                 | PFCE12 | DCM             | 0.58                | 1.93                | 10                 | 190        | 0.12 | 23                   |
| DCM 2                 | PFCE16 | DCM             | 1.15                | 3.85                | 20                 | 193        | 0.13 | 30                   |
| DCM 3                 | PFCE19 | DCM             | 1.73                | 5.78                | 30                 | 152        | 0.17 | 27                   |
| CHCL <sub>3</sub> 1   | PFCE32 | Chloroform      | 0.58                | 1.93                | 10                 | 157        | 0.31 | 34                   |
| CHCL <sub>3</sub> 2   | PFCE33 | Chloroform      | 1.15                | 3.85                | 20                 | 171        | 0.26 | 46                   |
| CHCL <sub>3</sub> 3   | PFCE34 | Chloroform      | 1.73                | 5.78                | 30                 | 150        | 0.23 | 40                   |

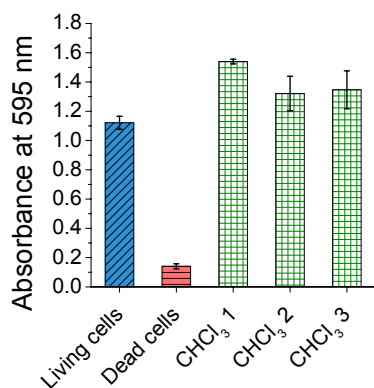

**Figure S3. Cell viability assay after incubation with PFCE-PLGA chloroform nanoparticles for 24 hours.**

### 2.2.Characterization of nanoparticles loaded with Atto-647 for confocal imaging

**Table S9. Flow rates and characterization of DCM PFCE-PLGA nanoparticles used for cellular uptake studies (Figure 4b and S3 and S4)**

| Sample              | $Q_{PFCE}$ (mL/min) | $Q_{PLGA}$ (mL/min) | $Q_{PVA}$ (mL/min) | $R_h$ (nm) | PDI  | PFCE content (wt.-%) |
|---------------------|---------------------|---------------------|--------------------|------------|------|----------------------|
| PFCE35 <sup>a</sup> | 1.15                | 3.85                | 20                 | 163        | 0.27 | 38                   |
| PFCE36              | 1.44                | 4.81                | 25                 | 162        | 0.30 | 42                   |
| PFCE37              | 1.73                | 5.78                | 30                 | 128        | 0.17 | 39                   |

<sup>a</sup> used in Figure 4b

### 2.3. Confocal microscopy of cells after nanoparticle uptake

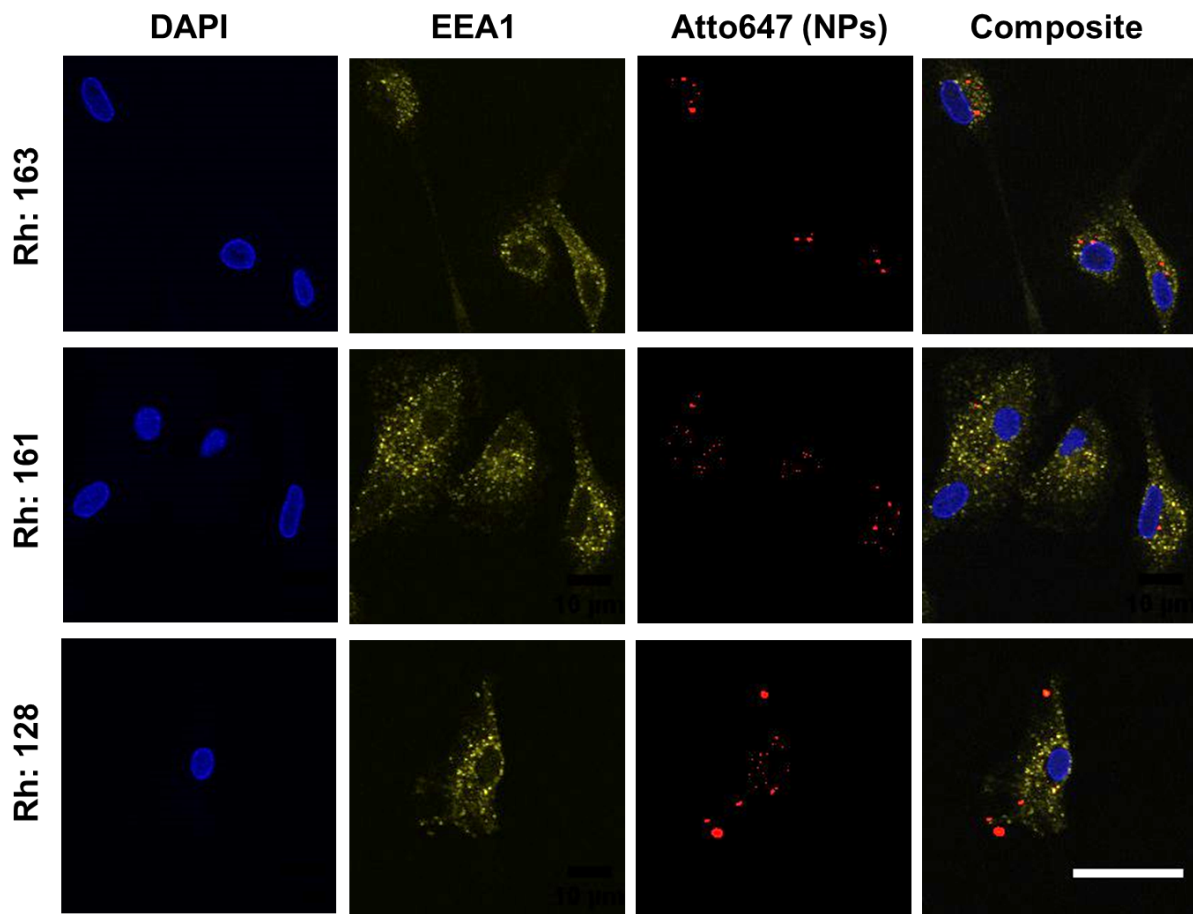

Figure S4. Confocal microscopy images with EEA1 staining. Scale bar: 25  $\mu\text{m}$ . Images are processed with ImageJ.

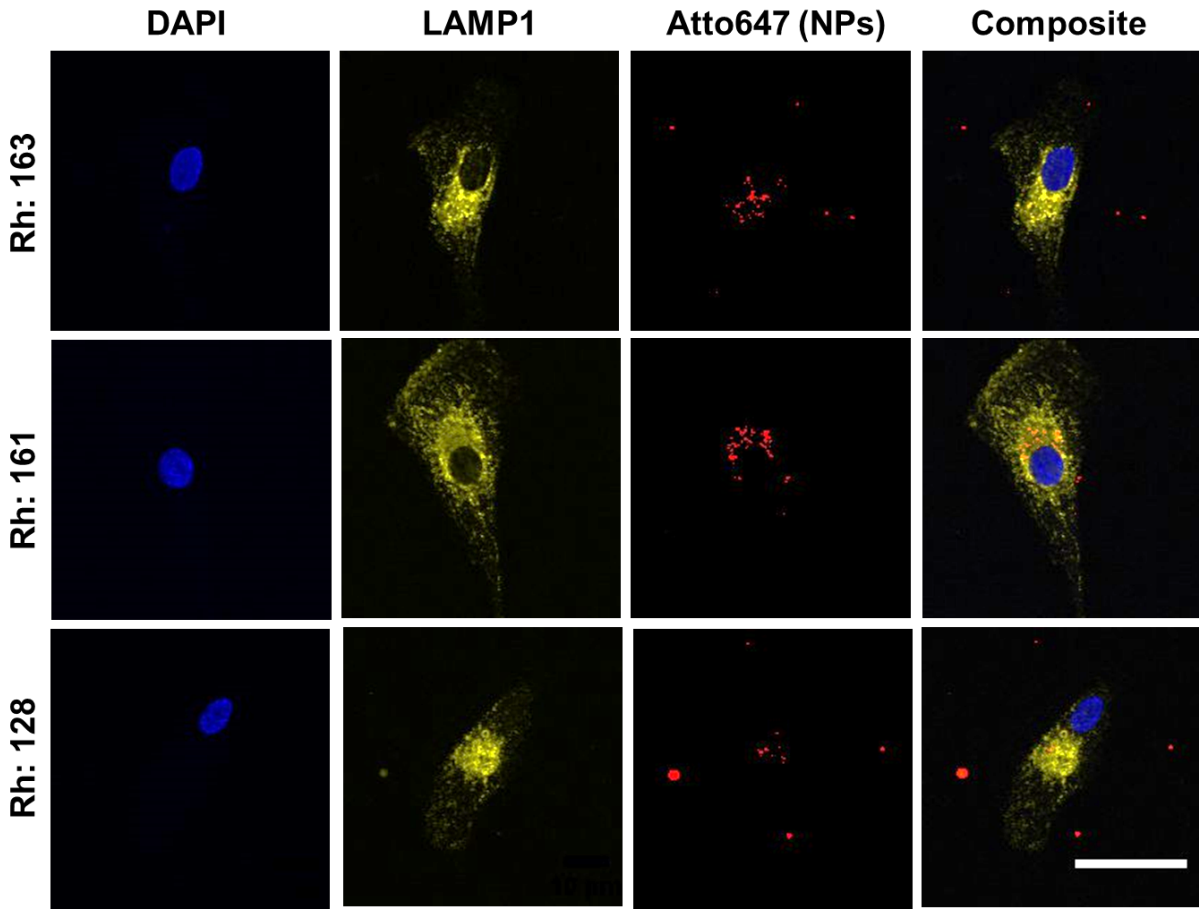

Figure S5. Confocal microscopy images with LAMP1 staining. Scale bar 25  $\mu\text{m}$ . Images are processed with ImageJ.

## 2.4. $^{19}\text{F}$ MRI and Ultrasound in vitro

**Table S10. Characteristics of PFC-PLGA nanoparticles used for  $^{19}\text{F}$  MRI imaging in Figure 4d and S6.**

| Nr. in Figure | Sample | Organic solvent | $Q_{\text{PFC}}$ (mL/min) | $Q_{\text{PLGA}}$ (mL/min) | $Q_{\text{PVA}}$ (mL/min) | $R_h$ (nm) | PDI  | PFC content (wt.-%) |
|---------------|--------|-----------------|---------------------------|----------------------------|---------------------------|------------|------|---------------------|
| 1             | PFCE21 | Chloroform      | 0.58                      | 1.93                       | 10                        | 168        | 0.25 | 35                  |
| 2             | PFCE22 | Chloroform      | 1.15                      | 3.85                       | 20                        | 162        | 0.20 | 42                  |
| 3             | PFCE23 | Chloroform      | 1.73                      | 5.78                       | 30                        | 136        | 0.12 | 36                  |
| 4             | PFOB1  | DCM             | 0.58                      | 1.93                       | 10                        | 194        | 0.31 | 42                  |
| 5             | PFOB5  | DCM             | 1.15                      | 3.85                       | 20                        | 191        | 0.27 | 52                  |
| 6             | PFOB9  | DCM             | 1.73                      | 5.78                       | 30                        | 140        | 0.20 | 52                  |
| 7             | PFCE12 | DCM             | 0.58                      | 1.93                       | 10                        | 190        | 0.12 | 23                  |
| 8             | PFCE16 | DCM             | 1.15                      | 3.85                       | 20                        | 193        | 0.13 | 30                  |
| 9             | PFCE19 | DCM             | 1.73                      | 5.78                       | 30                        | 152        | 0.17 | 27                  |

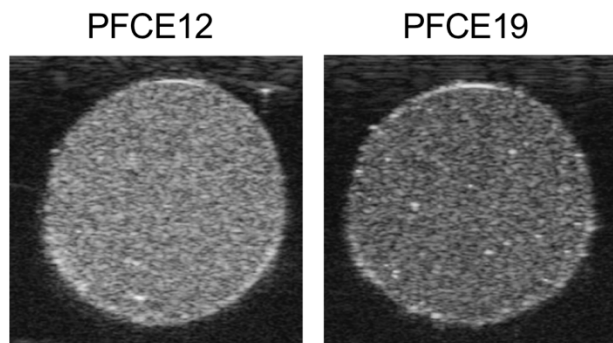

**Figure S6. Ultrasound images showing the signal of various nanoparticle suspensions. Nanoparticles in suspension placed in a gel phantom show acoustic contrast to the surrounding gel. Nanoparticles presented here were produced with DCM. Water was used as a negative control.  $c(\text{NP}) = 10 \text{ mg mL}^{-1}$**

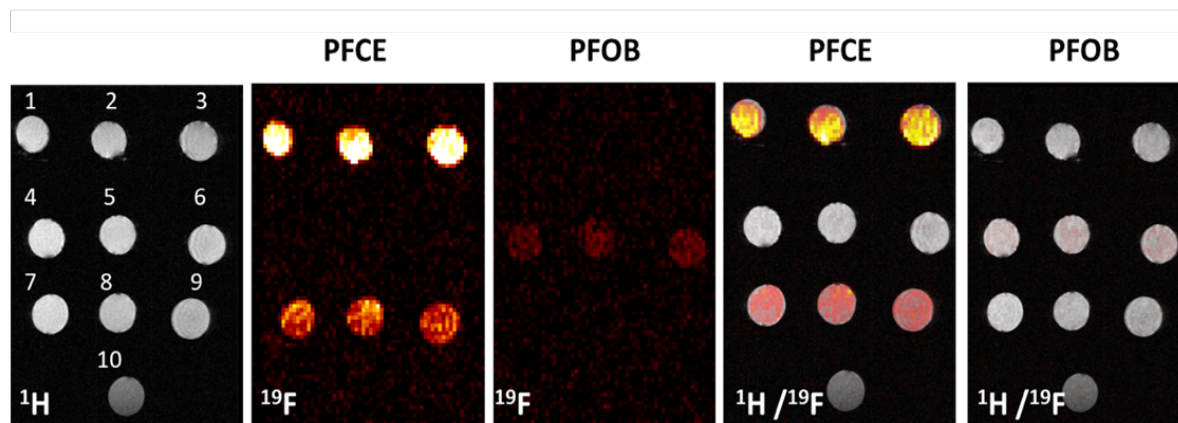

**Figure S7.**  $^{19}\text{F}$  MRI images of aqueous dispersions of PFCE-nanoparticles produced either with chloroform (first row) or DCM (third row) and PFOB nanoparticles (mid row).  $c(\text{NP}) = 10 \text{ mg mL}^{-1}$ , 11.7 T, 3D RARE sequence.

**Table S11.** Signal-to-noise ratio  $^{19}\text{F}$  MRI.

| # in Figure 6A | NP name         | Solvent    | SNR  | Average SNR |
|----------------|-----------------|------------|------|-------------|
| 1              | PFCE21          | Chloroform | 10.1 |             |
| 2              | PFCE22          | Chloroform | 9.7  | 10.2        |
| 3              | PFCE23          | Chloroform | 10.7 |             |
| 4              | PFOB1           | DCM        | 2.9  |             |
| 5              | PFOB5           | DCM        | 2.6  | 2.6         |
| 6              | PFOB9           | DCM        | 2.4  |             |
| 7              | PFCE12          | DCM        | 6.3  |             |
| 8              | PFCE16          | DCM        | 6.4  | 6.2         |
| 9              | PFCE19          | DCM        | 6.0  |             |
| 10             | Control – water | -          | 0.9  |             |

The differences in signal intensity can be attributed to a different encapsulation of PFC. Since PFOB displays several NMR signals, only some of the  $^{19}\text{F}$  nuclei of PFOB can be imaged with conventional sequence without chemical shift artifacts. Therefore, the images of PFOB nanoparticles have lower signal intensity than the PFCE nanoparticles, despite the fact that they

have higher PFC encapsulation. Furthermore, with the PFCE-PLGA nanoparticles made with chloroform, an average signal-to-noise ratio of 10 could be obtained in just 45 seconds of imaging, which is comparable to PFCE-PLGA nanoparticles made with the conventional batch method (Table S12). Both concentration and imaging time used here are applicable for the imaging *in vivo*.

### 2.5. $^{19}\text{F}$ MRI *in vivo* at different timepoints

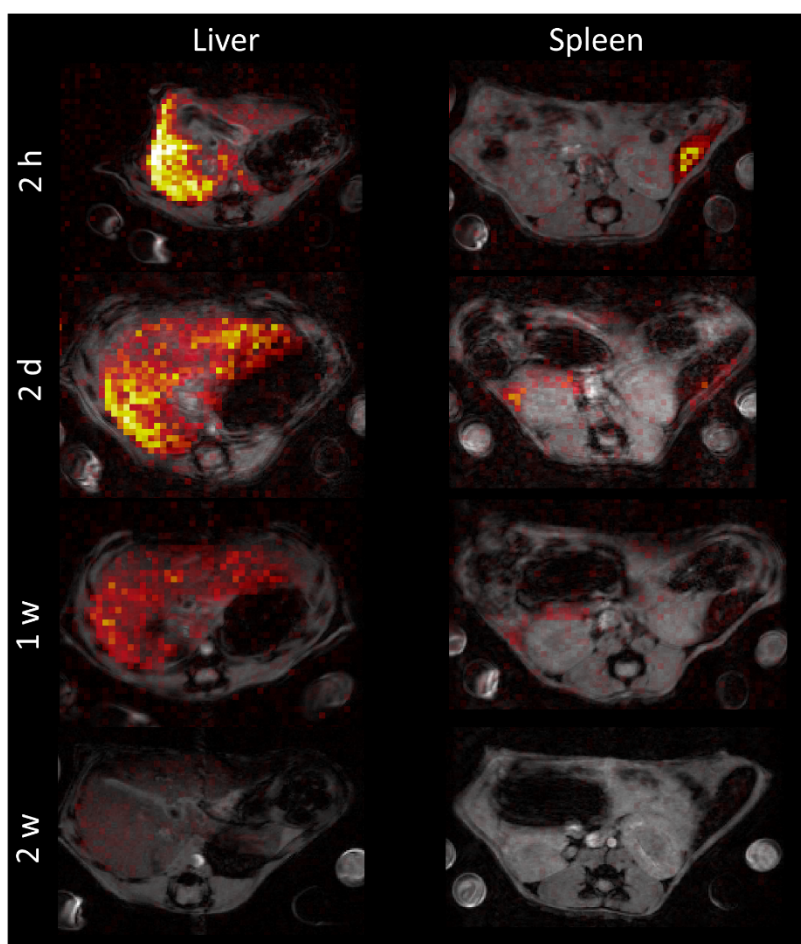

**Figure S8. In vivo  $^{19}\text{F}$  MRI images of liver and spleen. Liver and spleen were imaged at different time points to check for the presence of  $^{19}\text{F}$  signal.**
